# Supplementary material
Source: MDPI journal article supplement (https://www.mdpi.com/2073-4395/10/3/385)
Supplement: s1 [file s1]

Table S1

| Planting sites   | pH               | EC<br>( $\mu$ s/cm) | OM<br>(g/kg)      | Available N<br>(mg/kg) | Available<br>P(mg/kg) | Available K<br>(mg/kg) | Available Fe<br>(mg/kg) |
|------------------|------------------|---------------------|-------------------|------------------------|-----------------------|------------------------|-------------------------|
| Jutai<br>(Sup1)  | 6.31 $\pm$ 0.23  | 92.36 $\pm$ 10.32   | 19.67 $\pm$ 2.83* | 63.12 $\pm$ 3.18       | 83.22 $\pm$ 6.05*     | 68.22 $\pm$ 6.23       | 71.22 $\pm$ 5.36*       |
| Shiji<br>(Con1)  | 6.86 $\pm$ 0.29* | 132.18 $\pm$ 13.26* | 13.21 $\pm$ 3.05  | 61.67 $\pm$ 5.29       | 70.23 $\pm$ 3.11      | 70.35 $\pm$ 7.16       | 57.27 $\pm$ 4.28        |
| Jutai<br>(Sup15) | 6.12 $\pm$ 0.15  | 103.12 $\pm$ 15.68  | 22.32 $\pm$ 1.69* | 75.25 $\pm$ 6.32*      | 112.37 $\pm$ 10.80*   | 83.79 $\pm$ 5.23       | 65.52 $\pm$ 3.19*       |
| Shiji<br>(Con15) | 6.78 $\pm$ 0.12* | 165.37 $\pm$ 9.27*  | 15.60 $\pm$ 2.15  | 66.52 $\pm$ 3.36       | 80.23 $\pm$ 7.25      | 80.92 $\pm$ 8.17       | 50.36 $\pm$ 5.21        |
